# Supplementary material for: Comparative study of using different alkali metal alkylcarboxylates as electron injection materials in OLEDs
Source: Royal Society of Chemistry journal article supplement (doi:10.1039/c5tc00424a), 2015-01-01
Supplement: c5tc00424a1.pdf [file c5tc00424a1.pdf]

# Comparative Study of Using Different Alkali Metal Alkylcarboxylates as Electron Injection Materials in OLEDs

Ronggang Shangguan,<sup>a</sup> Guangyuan Mu,<sup>a</sup> and Lei Wang,<sup>\*a</sup> Shaoqing Zhuang,<sup>a</sup> Wangbo,<sup>a</sup> Chin H. Chen<sup>b</sup>

<sup>a</sup> Wuhan National Laboratory for Optoelectronics, Huazhong University of Science and Technology, Wuhan 430074, P. R. China.

<sup>b</sup>Guangdong Aglaia Optoelectronic Materials Co., Ltd, Shunde, Guangdong 528300, P. R. China.

<sup>b</sup>Guangdong Aglaia Optoelectronic Materials Co., Ltd, Guang Zhou, 510000, P. R. China.

\* Corresponding Author, E-mail: wanglei@mail.hust.edu.cn; Tel: +86-27-87793032.

1. The affect of the EIL thickness on the electroluminescent characteristics of devices.

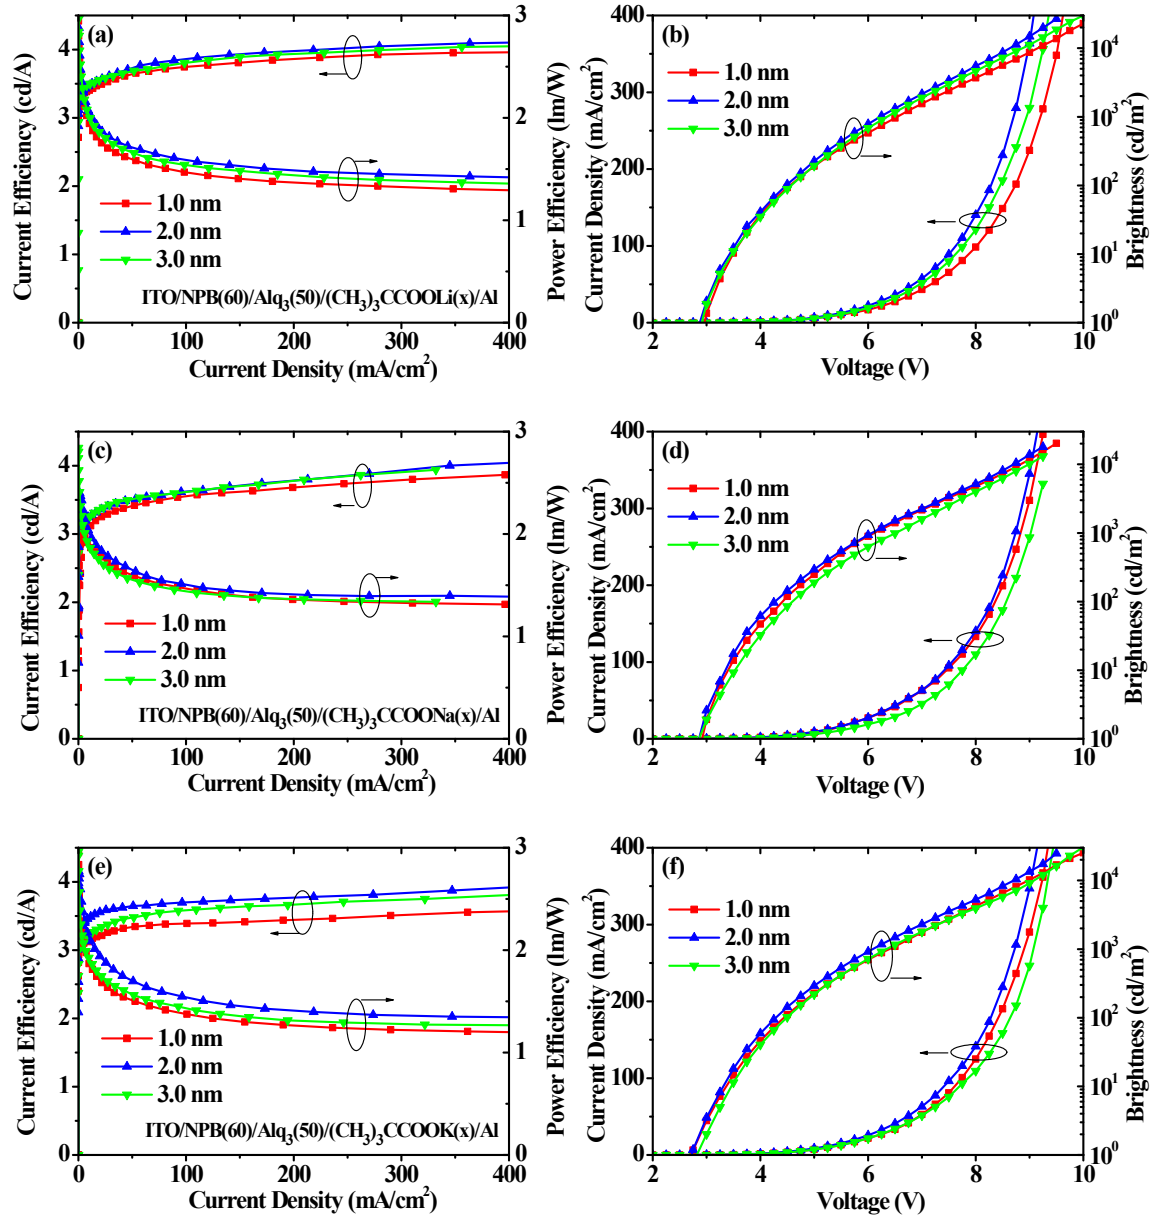

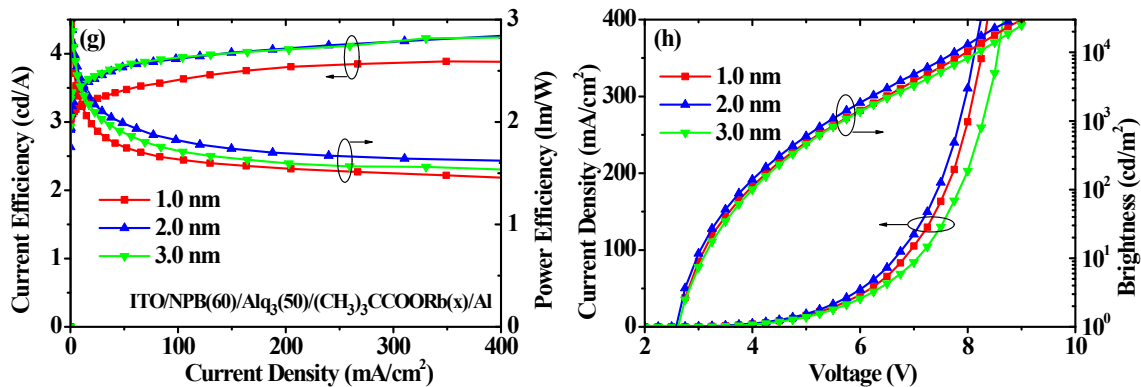

SFig.1 (a) Dependence of efficiency on the thickness of  $(\text{CH}_3)_3\text{CCOOLi}$  in the device ITO/NPB (60 nm)/Alq<sub>3</sub> (50 nm)/  $(\text{CH}_3)_3\text{CCOOLi}$  /Al; (b) J-V-B curves of the devices; (c) Dependence of efficiency on the thickness of  $(\text{CH}_3)_3\text{CCOONa}$  in the device ITO/NPB (60 nm)/Alq<sub>3</sub> (50 nm)/  $(\text{CH}_3)_3\text{CCOONa}$  /Al; (d) J-V-B curves of the devices; (e) Dependence of efficiency on the thickness of  $(\text{CH}_3)_3\text{CCOOK}$  in the device ITO/NPB (60 nm)/Alq<sub>3</sub> (50 nm)/  $(\text{CH}_3)_3\text{CCOOK}$  /Al; (f) J-V-B curves of the devices; (g) Dependence of efficiency on the thickness of  $(\text{CH}_3)_3\text{CCOORb}$  in the device ITO/NPB (60 nm)/Alq<sub>3</sub> (50 nm)/  $(\text{CH}_3)_3\text{CCOORb}$  /Al; (h) J-V-B curves of the devices.

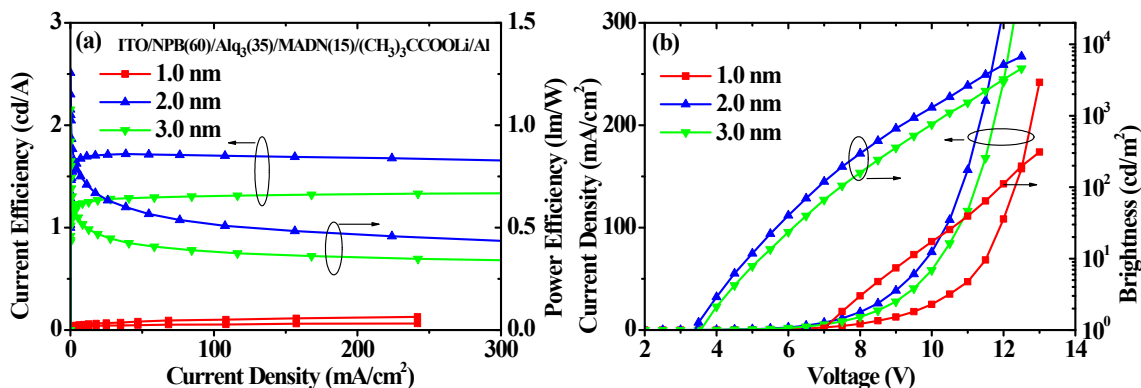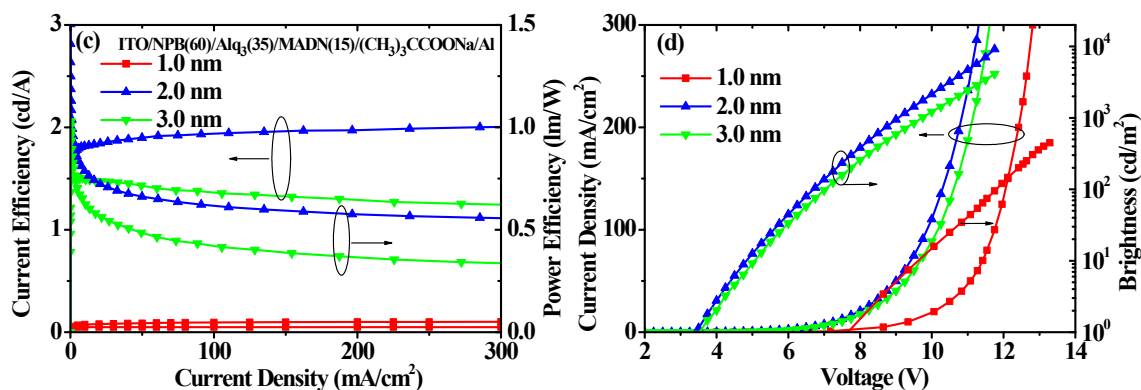

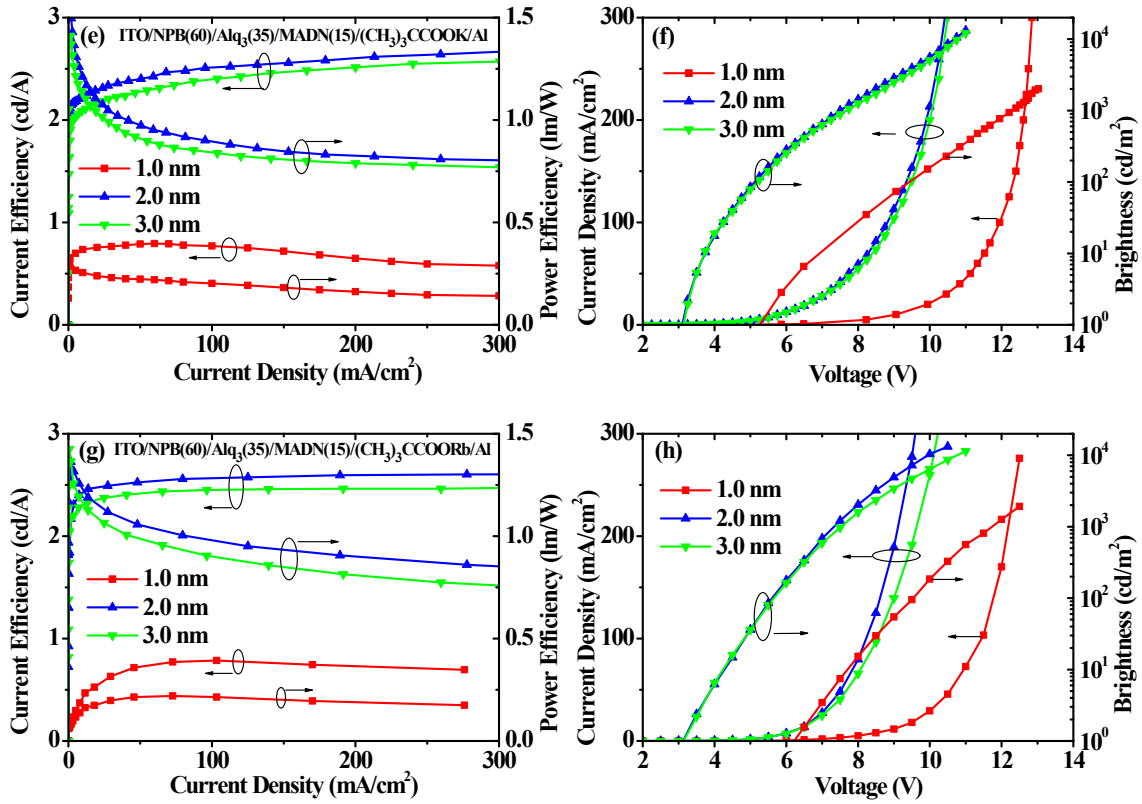

SFig.2 (a) Dependence of efficiency on the thickness of  $(\text{CH}_3)_3\text{CCOOLi}$  in the device ITO/NPB (60 nm)/Alq<sub>3</sub> (35 nm) / m-ADN (15 nm)/  $(\text{CH}_3)_3\text{CCOOLi}$  /Al; (b) J-V-B curves of the devices; (c) Dependence of efficiency on the thickness of  $(\text{CH}_3)_3\text{CCOONa}$  in the device ITO/NPB (60 nm)/Alq<sub>3</sub> (35 nm) / m-ADN (15 nm)/  $(\text{CH}_3)_3\text{CCOONa}$  /Al; (d) J-V-B curves of the devices; (e) Dependence of efficiency on the thickness of  $(\text{CH}_3)_3\text{CCOOK}$  in the device ITO/NPB (60 nm)/Alq<sub>3</sub> (35 nm) / m-ADN (15 nm)/  $(\text{CH}_3)_3\text{CCOOK}$  /Al; (f) J-V-B curves of the devices; (g) Dependence of efficiency on the thickness of  $(\text{CH}_3)_3\text{CCOORb}$  in the device ITO/NPB (60 nm)/Alq<sub>3</sub> (35 nm) / m-ADN (15 nm)/  $(\text{CH}_3)_3\text{CCOORb}$  /Al; (h) J-V-B curves of the devices.

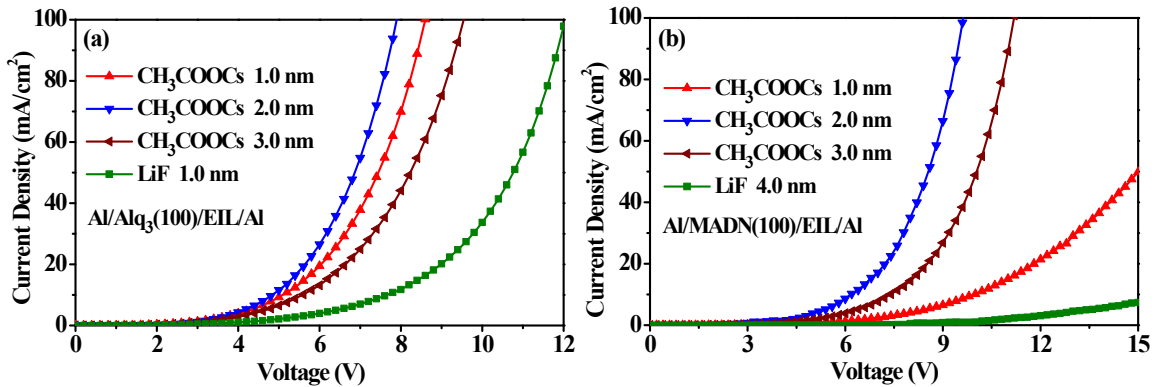

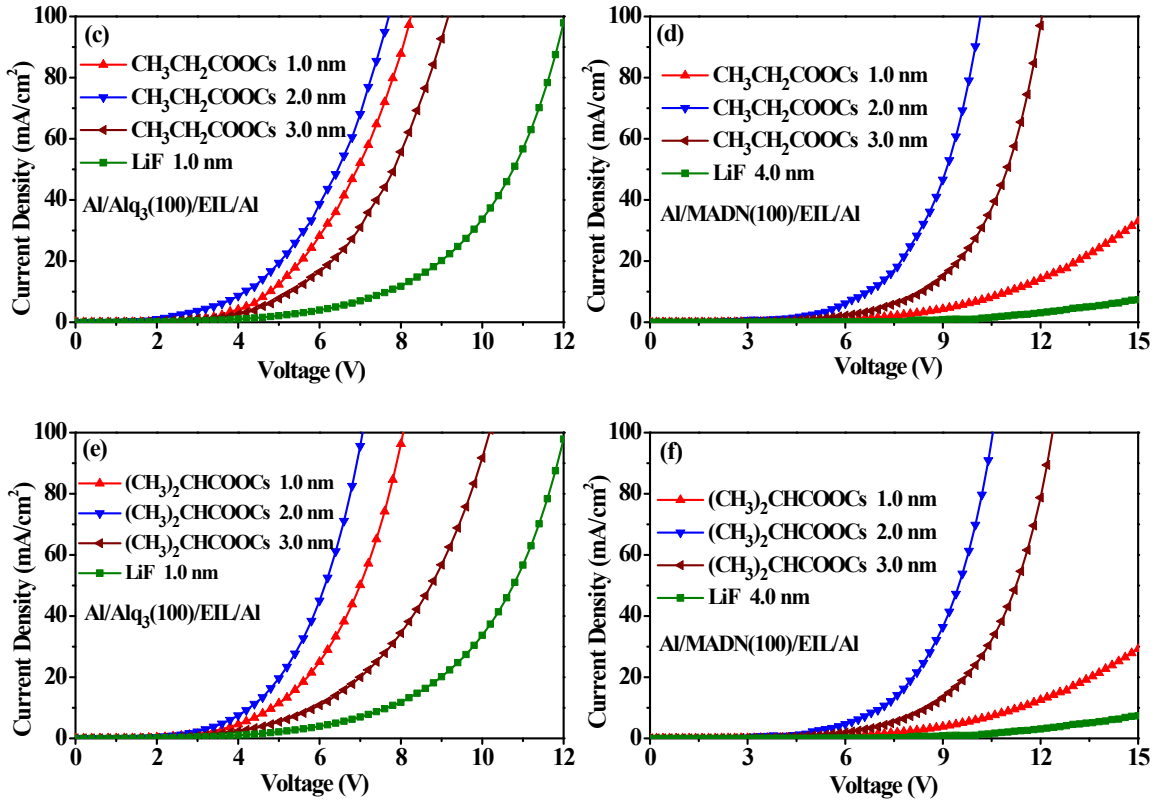

SFig.3 (a) The affect of CH<sub>3</sub>COOCs thickness on J-V curves for the electron-only device Al/Alq<sub>3</sub> (100 nm)/CH<sub>3</sub>COOCs/Al; (b) The affect of CH<sub>3</sub>COOCs thickness on J-V curves for the electron-only device Al/m-ADN (100 nm)/CH<sub>3</sub>COOCs/Al; (c) The affect of CH<sub>3</sub>CH<sub>2</sub>COOCs thickness on J-V curves for the electron-only device Al/Alq<sub>3</sub> (100 nm)/ CH<sub>3</sub>CH<sub>2</sub>COOCs /Al; (d) The affect of CH<sub>3</sub>CH<sub>2</sub>COOCs thickness on J-V curves for the electron-only device Al/m-ADN (100 nm)/ CH<sub>3</sub>CH<sub>2</sub>COOCs /Al; (e) The affect of (CH<sub>3</sub>)<sub>2</sub>CHCOOCs thickness on J-V curves for the electron-only device Al/Alq<sub>3</sub> (100 nm)/ (CH<sub>3</sub>)<sub>2</sub>CHCOOCs /Al; (f) The affect of (CH<sub>3</sub>)<sub>2</sub>CHCOOCs thickness on J-V curves for the electron-only device Al/m-ADN (100 nm)/ (CH<sub>3</sub>)<sub>2</sub>CHCOOCs /Al.

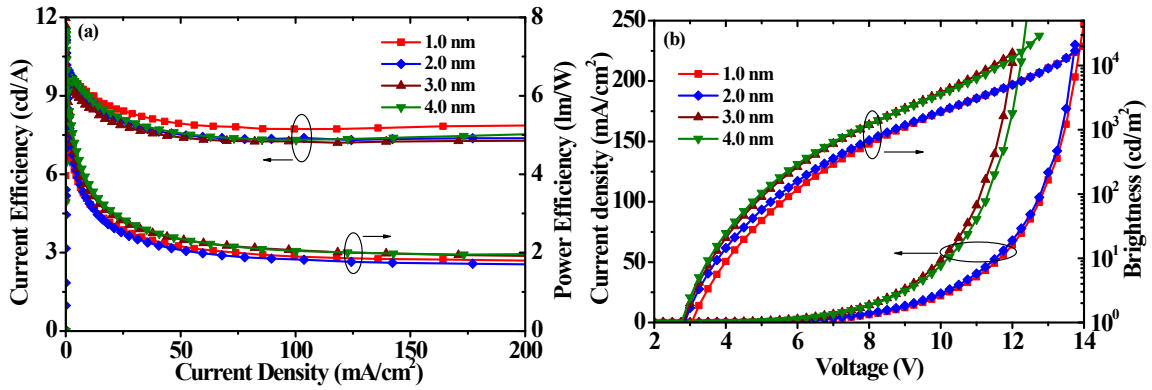

SFig.4 (a) Dependence of efficiency on the thickness of CsF in the device ITO/2-TNATA (60 nm)/NPB (10 nm)/Alq3:2%C545T (40 nm)/m-ADN(15 nm)/CsF/Al; (b) J-V-B curves of the devices.

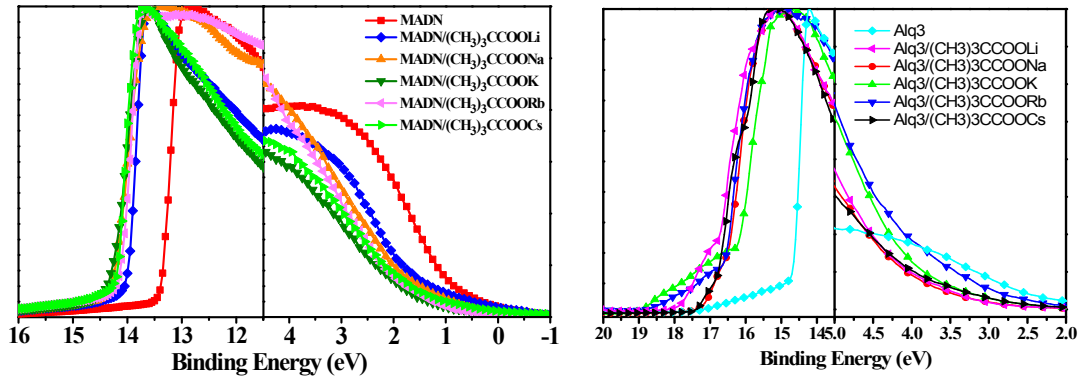

sFig. 5 UPS spectrums of the m-ADN film before and after the deposition of the five alkali metal pivalate complexes.
